# Supplementary material
Source: Royal Society of Chemistry journal article supplement (doi:10.1039/d6ay00249h)
Supplement: d6ay00249h1.pdf [file d6ay00249h1.pdf]

Supplementary information: Tables S1 and S2.

**Table S1:** Relative release amounts of glycerol and various flavor components at 14%, 20%, and 26% glycerol addition (calculated based on the release at 14% glycerol addition).

| Components                                  | 14%<br>Glycerol | 20%<br>Glycerol | 26%<br>Glycerol |
|---------------------------------------------|-----------------|-----------------|-----------------|
| Glycerol                                    | 1               | 1.203038        | 1.396641        |
| 2-Methoxyfuran                              | 1               | 1.789895        | 2.257583        |
| 3-Furfural                                  | 1               | 1.087538        | 1.259358        |
| Furfural                                    | 1               | 2.137335        | 4.639558        |
| Furfuryl Alcohol                            | 1               | 1.787554        | 2.25417         |
| 2-Acetylfuran                               | 1               | 3.286804        | 7.56234         |
| 5-Methylfurfural                            | 1               | 2.037543        | 3.424561        |
| 5-Methyl-2-furfuryl Alcohol                 | 1               | 1.790373        | 2.556107        |
| 2,3-Dihydro-2-methylbenzofuran              | 1               | 1.790787        | 2.937493        |
| 1-(2-Furyl)-2-hydroxyethanone               | 1               | 1.438637        | 1.551065        |
| 5-Hydroxymethylfurfural                     | 1               | 1.1874          | 1.146514        |
| Ligustilide                                 | 1               | 1.665784        | 2.729533        |
| Furanone                                    | 1               | 1.564885        | 2.010794        |
| Methyl Maltol                               | 1               | 1.566961        | 2.171875        |
| 6-Ethyl-5,6-dihydro-2H-pyran-2-one          | 1               | 1.168343        | 1.108265        |
| 2,3-Dihydro-3,5-dihydroxy-6-methyl-4H-pyran | 1               | 1.117035        | 1.056299        |
| 3,5-Dihydroxy-2-methyl-4H-pyran-4-one       | 1               | 1.161186        | 1.113142        |
| 3-Methylcyclopentane-1,2-dione              | 1               | 1.645164        | 2.086904        |
| 1,2-Cyclohexanedione                        | 1               | 1.59533         | 2.121519        |
| 1,2-Cyclopentanedione                       | 1               | 1.65058         | 2.289205        |
| 2-Cyclopentenone                            | 1               | 2.12767         | 3.330263        |
| 3-Methyl-2-cyclopenten-1-one                | 1               | 2.351794        | 3.410914        |
| 1-Acetoxy-2-butanone                        | 1               | 1.764543        | 2.213031        |
| 2,3-Dimethyl-2-cyclopenten-1-one            | 1               | 2.527299        | 4.274653        |
| 4-Cyclopenten-1,3-dione                     | 1               | 0.979821        | 1.650907        |
| Methyl Cyclopentenolone                     | 1               | 2.279356        | 4.061241        |
| Acetic Acid                                 | 1               | 1.158749        | 1.196068        |
| Propionic Acid                              | 1               | 1.263621        | 1.289025        |
| Isobutyric Acid                             | 1               | 1.252239        | 1.320786        |
| n-Valeric Acid                              | 1               | 1.33104         | 1.330972        |
| 3-Methylpentanoic Acid                      | 1               | 1.290544        | 1.506848        |
| n-Hexanoic Acid                             | 1               | 1.178836        | 1.230273        |
| Crotonic Acid                               | 1               | 1.405669        | 1.637863        |
| Octanoic Acid                               | 1               | 1.33062         | 1.499344        |
| Nonanoic Acid                               | 1               | 0.961357        | 1.091356        |
| Myristic Acid                               | 1               | 1.105748        | 0.97262         |

|                                 |   |          |          |
|---------------------------------|---|----------|----------|
| Methyl Lactate                  | 1 | 1.041191 | 1.354448 |
| Methyl Glycolate                | 1 | 1.360337 | 1.307143 |
| 2-Hydroxypropyl Acetate         | 1 | 1.215121 | 1.18603  |
| $\gamma$ -Butyrolactone         | 1 | 1.619807 | 1.771525 |
| Triacetin (Glycerol Triacetate) | 1 | 1.200418 | 1.374369 |
| Phenol                          | 1 | 1.800699 | 2.454097 |
| 2-Ethylphenol                   | 1 | 1.844539 | 2.862334 |
| Guaiacol                        | 1 | 1.835423 | 2.941263 |
| 4-Vinyl-2-methoxyphenol         | 1 | 2.191502 | 4.151947 |
| Vanillin                        | 1 | 1.224485 | 1.250296 |
| Epichlorohydrin                 | 1 | 1.410918 | 1.840844 |
| Phytol                          | 1 | 1.122879 | 1.072592 |
| Toluene                         | 1 | 1.032194 | 1.049848 |
| Styrene                         | 1 | 0.948222 | 0.771533 |
| Benzaldehyde                    | 1 | 1.165182 | 1.014474 |
| p-Hydroxy Styrene               | 1 | 1.550252 | 2.046479 |
| 1-Methylphenyl Ethanone         | 1 | 1.298438 | 3.144154 |
| Benzoic Acid                    | 1 | 1.237607 | 1.046997 |
| Phenylacetic Acid               | 1 | 1.385083 | 1.385767 |
| Solanone                        | 1 | 1.981549 | 3.557124 |
| Ambrettolide                    | 1 | 2.066426 | 3.326573 |
| 3-Hydroxy- $\beta$ -damascenone | 1 | 1.197596 | 1.192236 |
| Neophytadiene                   | 1 | 1.326507 | 1.658768 |
| Hydroxyacetone                  | 1 | 1.625319 | 1.867825 |
| 3-Hydroxy-2-butanone            | 1 | 1.638949 | 1.67914  |
| 1-Hydroxy-2-butanone            | 1 | 1.725916 | 1.82738  |
| Acetoxypropyl Peroxide          | 1 | 1.798824 | 2.220211 |
| 2-Hydroxy-2-butanone            | 1 | 1.112976 | 1.415006 |
| 3-Vinylpyridine                 | 1 | 1.711385 | 2.92498  |
| 3-Hydroxypyridine               | 1 | 1.373271 | 1.451927 |
| N-Methylpyrrolidone (NMP)       | 1 | 1.454175 | 1.96615  |
| 2-Pyrrolicarboxaldehyde         | 1 | 2.285282 | 3.691461 |
| 2-Acetylpyrrole                 | 1 | 2.470645 | 3.739099 |
| 1-(2-Furylmethyl)-1H-pyrrole    | 1 | 1.876518 | 4.188932 |
| 2-Methylpyrazine                | 1 | 3.014739 | 7.796344 |
| 2,6-Dimethylpyrazine            | 1 | 2.483548 | 5.004185 |
| 2,5-Dimethylpyrazine            | 1 | 2.51955  | 5.22292  |
| 2-Ethylpyrazine                 | 1 | 1.254473 | 1.614543 |
| Indole                          | 1 | 1.377135 | 1.579297 |
| Nicotine                        | 1 | 1.124328 | 1.243004 |

**Table S2:** Relative release amounts of various flavor components at 370°C, 385°C, and 400°C (calculated based on the release at 370°C).

| Components                                  | 370°C | 385°C    | 400°C    |
|---------------------------------------------|-------|----------|----------|
| Glycerol                                    | 1     | 0.909758 | 0.991116 |
| 2-Methoxyfuran                              | 1     | 1.028318 | 1.164119 |
| 3-Furfural                                  | 1     | 1.253393 | 1.0588   |
| Furfural                                    | 1     | 0.893258 | 0.105308 |
| Furfuryl Alcohol                            | 1     | 0.967213 | 1.16578  |
| 2-Acetylfuran                               | 1     | 0.945132 | 0.129911 |
| 5-Methylfurfural                            | 1     | 0.869889 | 0.160448 |
| 5-Methyl-2-furfuryl Alcohol                 | 1     | 1.083668 | 0.840914 |
| 2,3-Dihydro-2-methylbenzofuran              | 1     | 0.997071 | 0.419251 |
| 1-(2-Furyl)-2-hydroxyethanone               | 1     | 0.845967 | 1.425562 |
| 5-Hydroxymethylfurfural (HMF)               | 1     | 0.938375 | 0.995157 |
| Furanone                                    | 1     | 0.928704 | 1.192666 |
| Methyl Maltol                               | 1     | 0.948189 | 1.300048 |
| 6-Ethyl-5,6-dihydro-2H-pyran-2-one          | 1     | 1.00563  | 1.167924 |
| 2,3-Dihydro-3,5-dihydroxy-6-methyl-4H-pyran | 1     | 0.795586 | 0.634887 |
| 3,5-Dihydroxy-2-methyl-4H-pyran-4-one       | 1     | 0.962278 | 1.04265  |
| 3-Methylcyclopentane-1,2-dione              | 1     | 1.213119 | 1.990094 |
| 1,2-Cyclopentanedione                       | 1     | 1.094762 | 1.21169  |
| 2-Cyclopentenone                            | 1     | 1.240094 | 1.015448 |
| 3-Methyl-2-cyclopenten-1-one                | 1     | 1.487386 | 1.709178 |
| 1-Acetoxy-2-butanone                        | 1     | 3.550903 | 1.997636 |
| 2,3-Dimethyl-2-cyclopenten-1-one            | 1     | 1.433721 | 0.795897 |
| 4-Cyclopenten-1,3-dione                     | 1     | 0.74699  | 0.158993 |
| Methyl Cyclopentenolone                     | 1     | 1.234206 | 0.323288 |
| Acetic Acid                                 | 1     | 1.150205 | 1.467757 |
| Propionic Acid                              | 1     | 1.367352 | 1.773953 |
| Isobutyric Acid                             | 1     | 1.843387 | 1.850022 |
| 3-Methylpentanoic Acid                      | 1     | 1.166199 | 1.394693 |
| Hexanoic Acid                               | 1     | 1.103499 | 1.232736 |
| Octanoic Acid                               | 1     | 0.615454 | 1.238909 |
| Nonanoic Acid                               | 1     | 0.487457 | 1.240584 |
| Methyl Glycolate                            | 1     | 1.102197 | 1.507737 |
| Gamma-Butyrolactone (GBL)                   | 1     | 1.240601 | 1.589937 |
| Triacetin (Glycerol Triacetate)             | 1     | 0.817055 | 1.051947 |
| Phenol                                      | 1     | 1.166305 | 1.707534 |
| 2-Ethylphenol                               | 1     | 1.394447 | 1.727936 |
| Guaiacol                                    | 1     | 1.054136 | 0.525262 |
| 4-Vinyl-2-methoxyphenol                     | 1     | 0.899715 | 0.54833  |
| Vanillin                                    | 1     | 1.493231 | 1.359086 |
| Phytol                                      | 1     | 1.528236 | 1.712696 |
| Benzaldehyde                                | 1     | 2.454968 | 1.687974 |
| p-Hydroxy Styrene                           | 1     | 1.09373  | 1.488304 |

|                                 |   |          |          |
|---------------------------------|---|----------|----------|
| 1-Methylphenyl Ethanone         | 1 | 0.995888 | 0.109113 |
| Benzoic Acid                    | 1 | 0.239348 | 1.617406 |
| Phenylacetic Acid               | 1 | 1.097147 | 1.001693 |
| Solanone                        | 1 | 1.05457  | 0.155987 |
| Ambrettolide                    | 1 | 1.01773  | 0.573918 |
| 3-Hydroxy- $\beta$ -damascenone | 1 | 1.052525 | 1.030152 |
| Neophytadiene                   | 1 | 0.912334 | 0.781817 |
| Hydroxyacetone                  | 1 | 1.216023 | 1.844084 |
| 3-Hydroxy-2-butanone            | 1 | 1.248159 | 1.957468 |
| 1-Hydroxy-2-butanone            | 1 | 1.990475 | 2.303969 |
| Acetoxypropyl Peroxide          | 1 | 1.217412 | 1.304465 |
| 2-Hydroxy-2-butanone            | 1 | 0.931074 | 2.020793 |
| 3-Vinylpyridine                 | 1 | 0.990225 | 0.248654 |
| 3-Hydroxypyridine               | 1 | 1.031139 | 1.325941 |
| N-Methylpyrrolidone (NMP)       | 1 | 0.880219 | 1.097304 |
| 2-Pyrrolicarboxaldehyde         | 1 | 0.976041 | 1.167719 |
| 2-Acetylpyrrole                 | 1 | 1.192657 | 1.560644 |
| 1-(2-Furylmethyl)-1H-pyrrole    | 1 | 0.692869 | 5.589657 |
| 2-Methylpyrazine                | 1 | 1.086038 | 0.27924  |
| 2,6-Dimethylpyrazine            | 1 | 1.0193   | 0.335714 |
| 2,5-Dimethylpyrazine            | 1 | 0.169755 | 0.345357 |
| Nicotine                        | 1 | 0.981384 | 1.249065 |
